# Supplementary material
Source: Springer Nature journal article supplement (https://www.springermedizin.de/resource/supplementary/12958_2005_221_MOESM3_ESM.pdf/9567394)

a

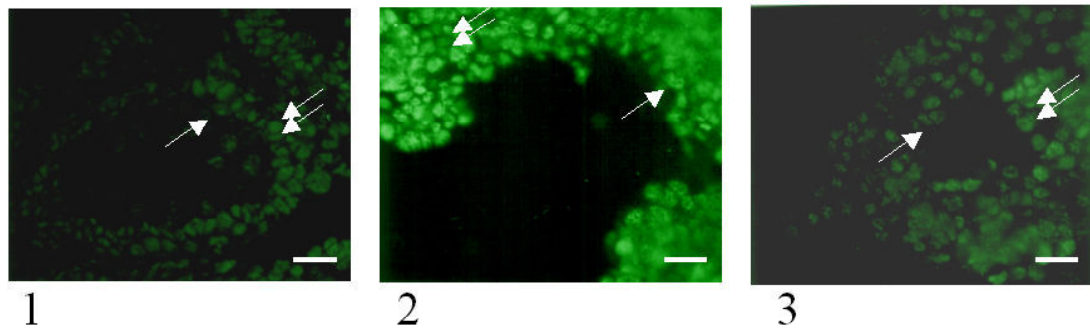

b

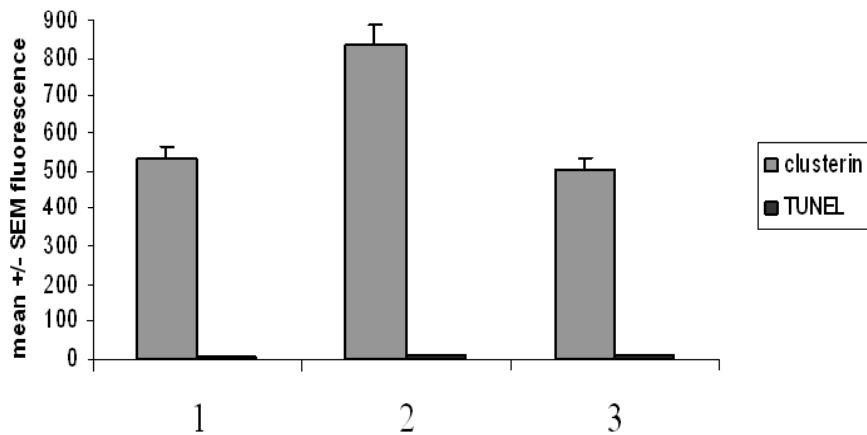

Supplement: MOESM3 [file 9567394]
